# Supplementary material
Source: PubMed Central journal article supplement (PMC1200257)

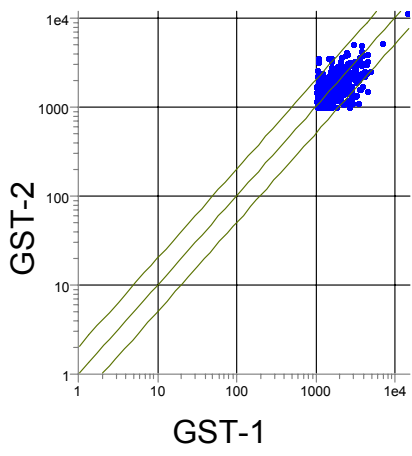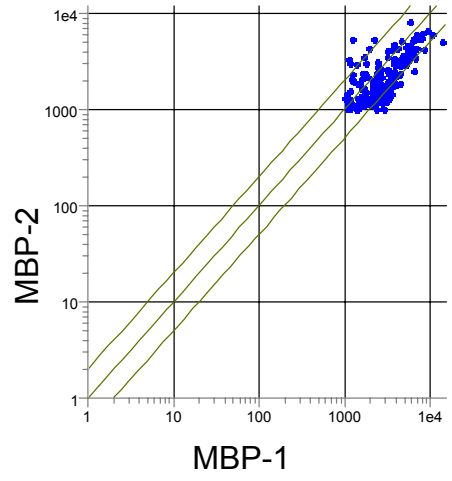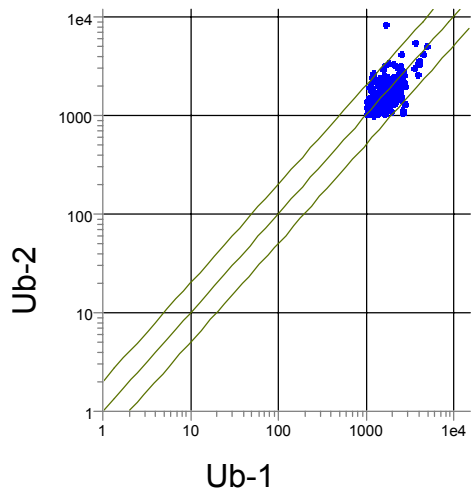

Supplement: pnas_0501208102_1.pdf [file pnas_0501208102_1.pdf]

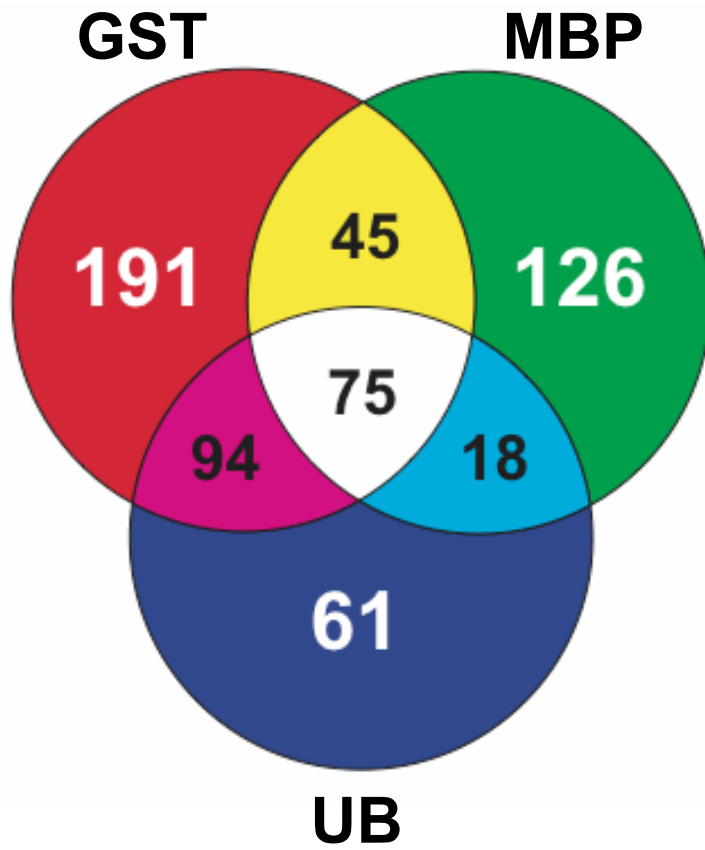

Supplement: pnas_0501208102_2.pdf [file pnas_0501208102_2.pdf]

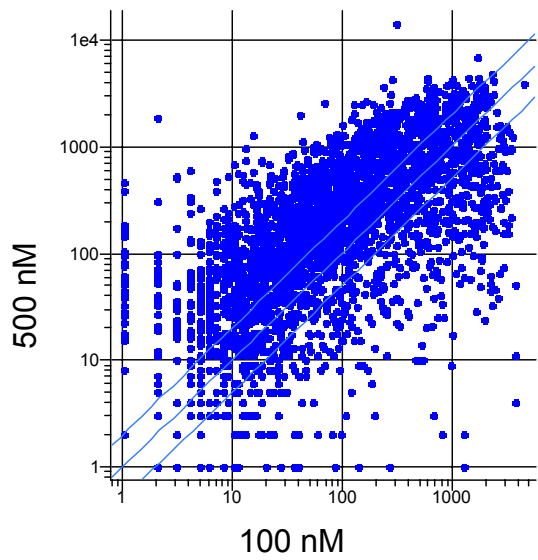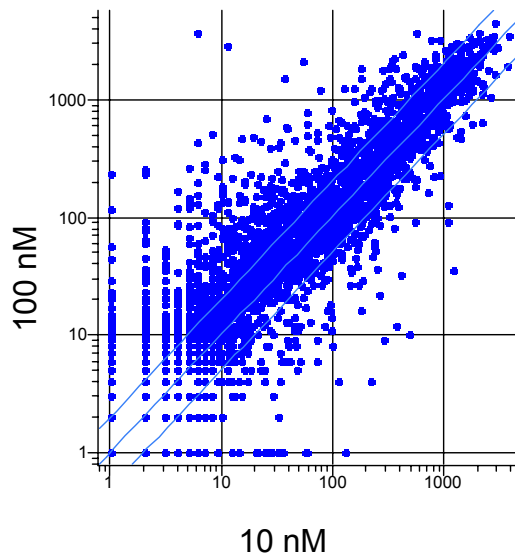

Supplement: pnas_0501208102_3.pdf [file pnas_0501208102_3.pdf]

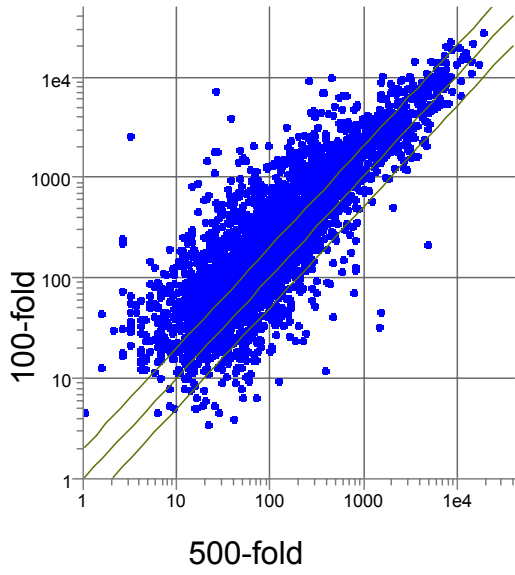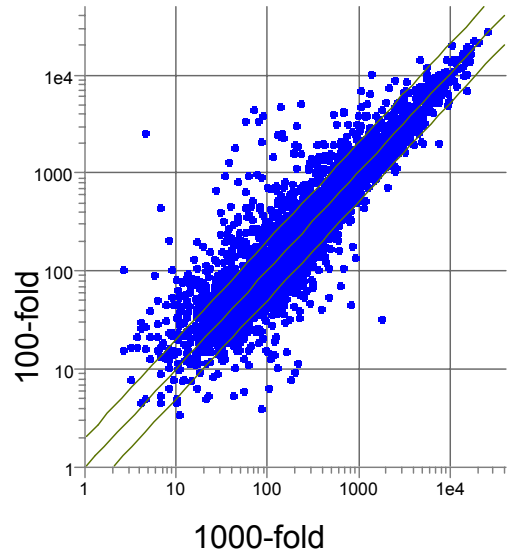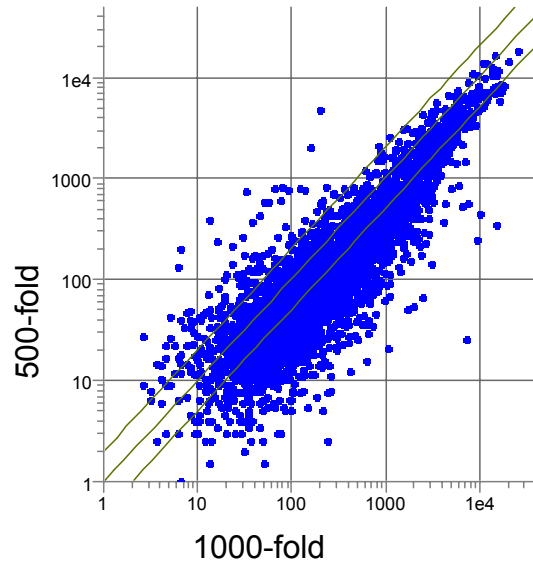

Supplement: pnas_0501208102_4.pdf [file pnas_0501208102_4.pdf]
